# Supplementary material for: Formation and evolution of micropipes in SiC crystals
Source: Royal Society of Chemistry journal article supplement (doi:10.1039/c1ce05806a), 2011-12-15
Supplement: c1ce05806a.pdf [file c1ce05806a.pdf]

## Support information

### Formation and evolution of micropipes in SiC crystals

Shenghuang Lin\*, Zhiming Chen, Ying Yang, Sujuan Liu, Yintu Ba, Lianbi Li, Chen Yang  
(Department of Electronic Engineering, Xi'an University of Technology, Xi'an 710048, PR China)

\*) E-mail: [shenghuanglin@163.com](mailto:shenghuanglin@163.com)

#### Figures S1~S6:

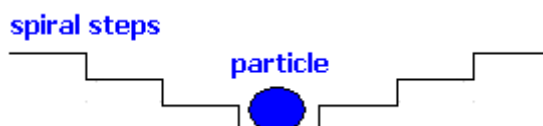

Figure S1 Schematic illustration of a particle hampering spiral steps.

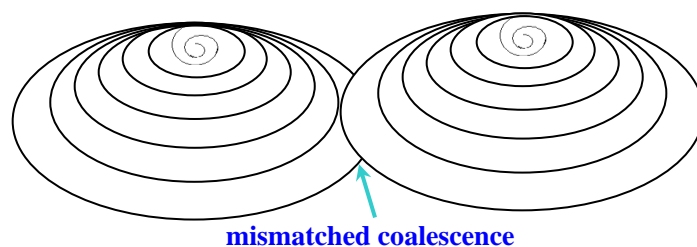

Figure S2 Schematic of mismatched coalescence between two nucleation sites

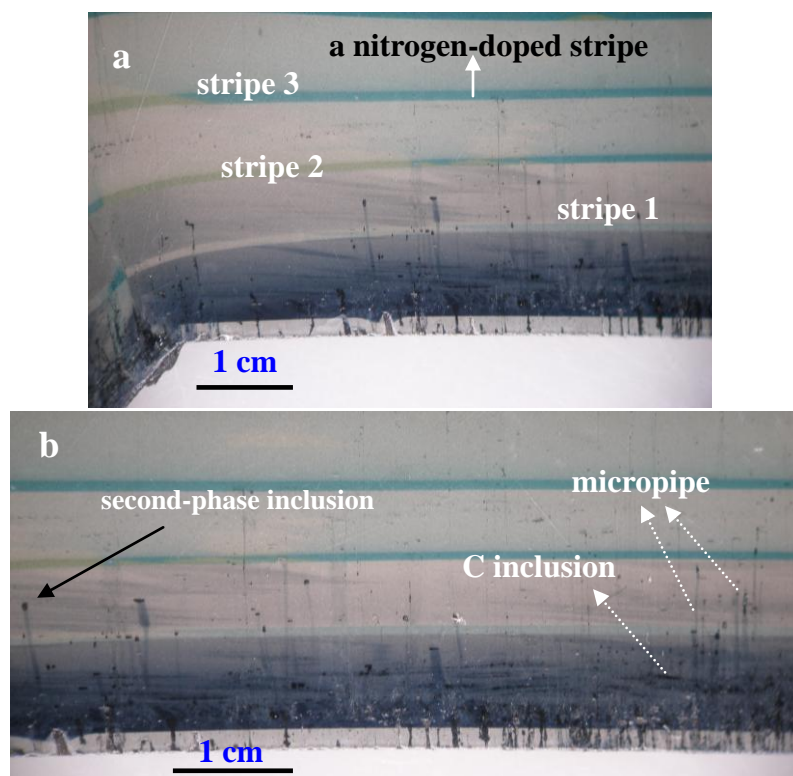

Figure S3 Axial-cut slice of the modulated nitrogen-doped 6H-SiC crystal

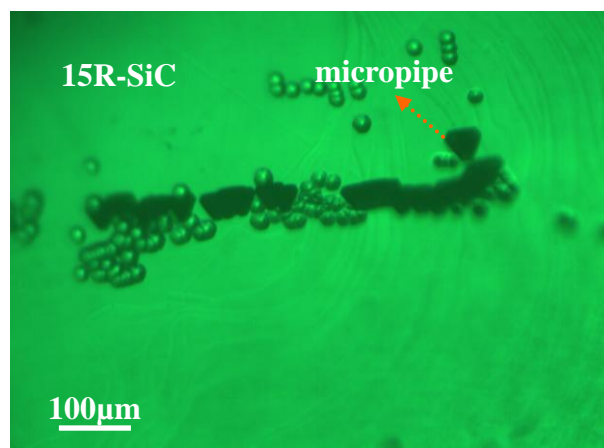

Figure S4 Optical photographs of micropipes interacting with each other in 15R-SiC

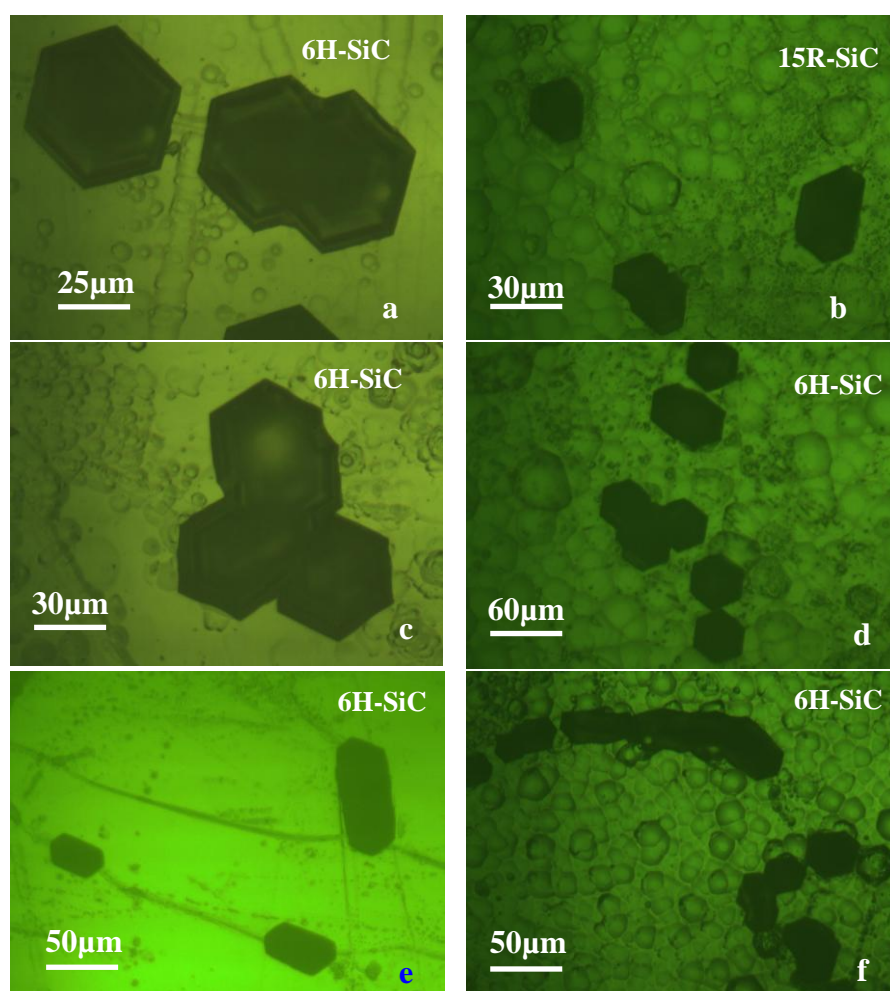

Figure S5 Optical photographs of micropipes combining with each other in etched 6H- and 15R-SiC

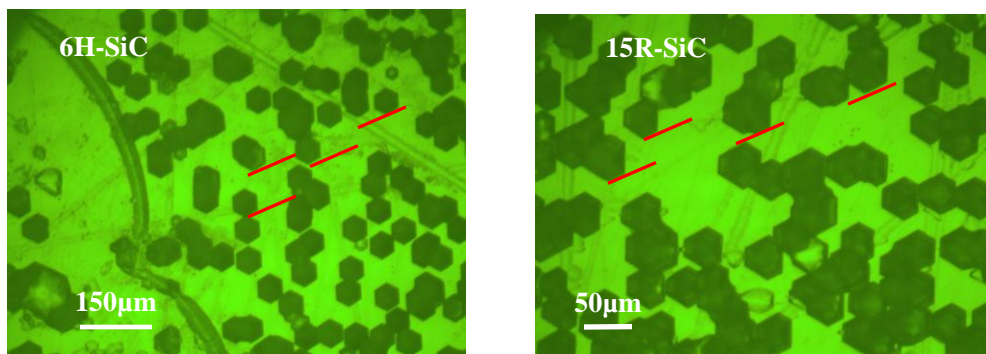

**Figure S6** Optical images of etched 6H- and 15R-SiC (red lines are superposed with the edges of etch pits)
